# Supplementary material for: SIRT3 protects hepatocytes from oxidative injury by enhancing ROS scavenging and mitochondrial integrity
Source: PubMed Central journal article supplement (PMC5680927; doi:10.1038/cddis.2017.564), 2017-10-26
Supplement: cddis2017564x1.pdf [file cddis2017564x1.pdf]

## Supplementary Figure S1

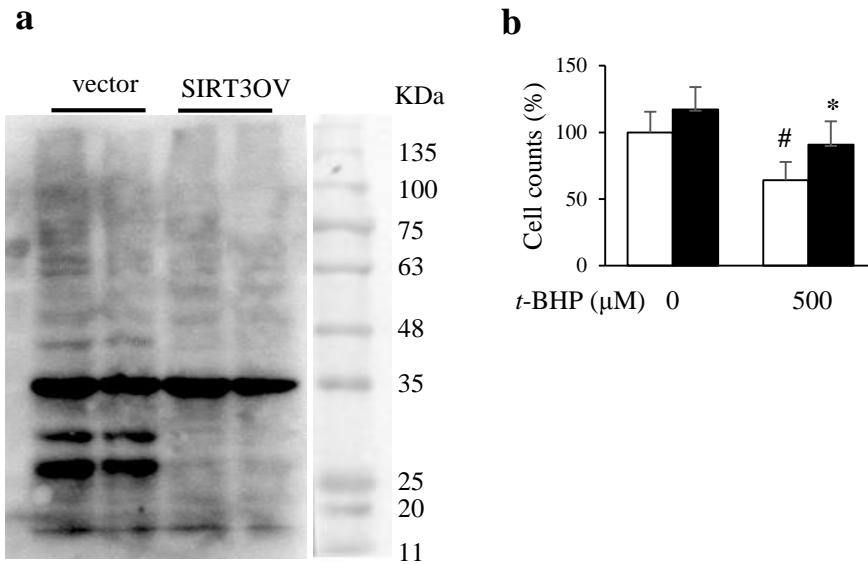

**Supplementary Figure S1 (a)** SIRT3 overexpression decreased acetylation level of total protein in *t*-BHP-treated AML12 cells. **(b)** Cell viability was determined by trypan blue dye exclusion. The number of viable cells were counted by 0.4% trypan blue stain exclusion using a hemocytometer and expressed as a percentage relative to control cells. \* $p < 0.05$ , and SIRT3OV vs. vector cells, and # $p < 0.05$  *t*-BHP-treated vs. ctrl cells.

## Supplementary Figure S2

**a**

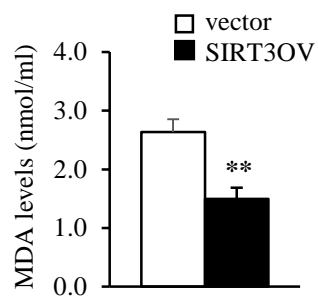

**b**

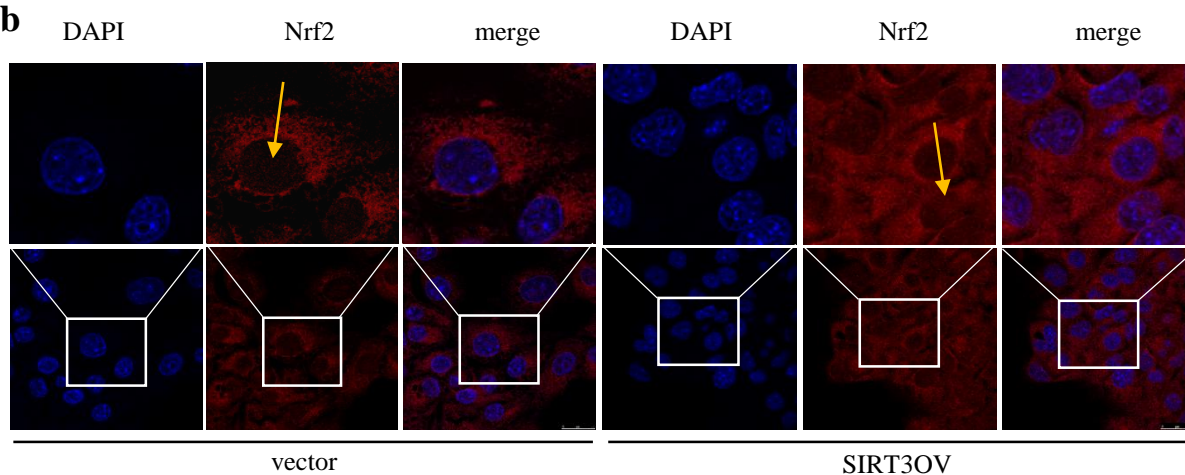

**Supplementary Figure S2 (a)** Intracellular MDA(malondialdehyde) level. **(b)** Confocal immunofluorescence image of total and nuclear Nrf2 protein. Nrf2 and nuclei were stained by Texas Red and DAPI, respectively. Scale bar, 10  $\mu$ m. \*\*p < 0.01, and SIRT3OV vs. vector cells.

## Supplementary Figure S3

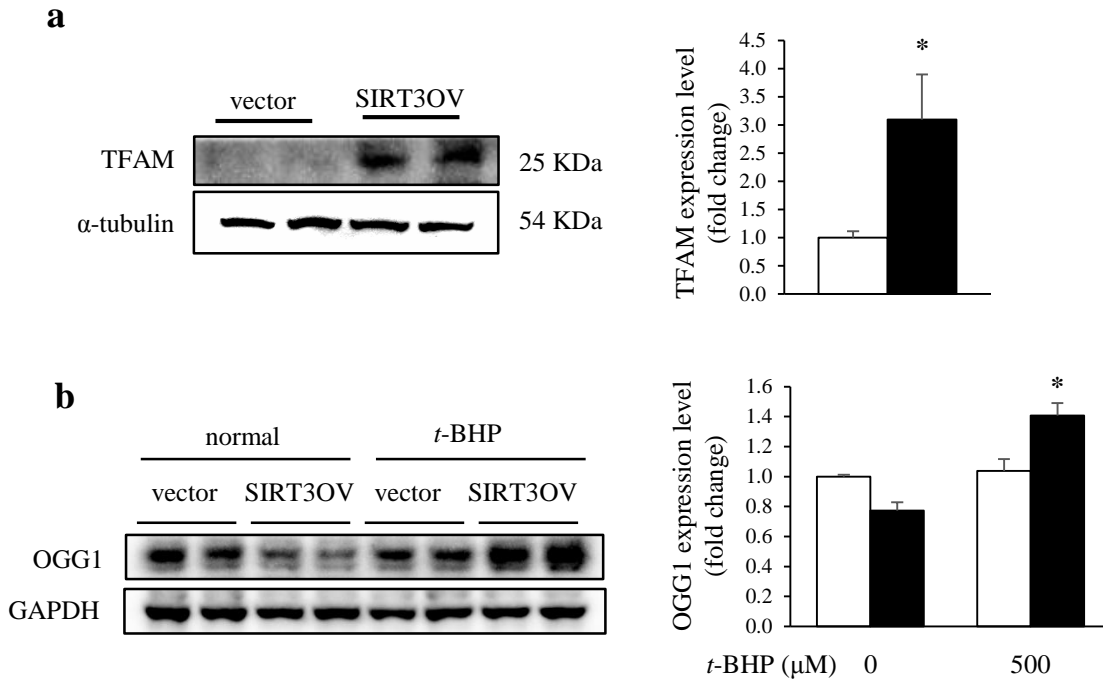

**Supplementary Figure S3 (a)** TFAM protein level in vector and SIRT3 overexpressed AML12 cells treated with 500  $\mu$ M *t*-BHP for 12h. **(b)** OGG1 expression in the vector and SIRT3OV cells under normal and *t*-BHP treated conditions. \* $p < 0.05$ , and SIRT3OV vs. vector cells.

**Supplementary Table 1** The detailed information of antibodies used in immunoblotting.

| Name                     | Cat.No.    | Company           |
|--------------------------|------------|-------------------|
| p-AMPK                   | SC-33524   | Santa Cruz        |
| AMPK                     | SC-25792   | Santa Cruz        |
| PGC1 $\alpha$            | AB54481    | Abcam             |
| Tom20                    | SC-17764   | Santa Cruz        |
| Drp1                     | #8570      | CST               |
| MFN1                     | SC-50330   | Santa Cruz        |
| Nrf2                     | #12721     | CST               |
| KEAP1                    | #8047      | CST               |
| OPA1                     | SC-30573   | Santa Cruz        |
| $\alpha$ -tubulin        | SC-8035    | Santa Cruz        |
| GAPDH                    | SC-25778   | CST               |
| Ku70                     | SC-135963  | Santa Cruz        |
| Bax                      | SC-526     | Santa Cruz        |
| SOD2                     | 24127-1-AP | Proteintech Group |
| histone 3                | SC-10809   | Santa Cruz        |
| OGG1                     | SC-376935  | Santa Cruz        |
| catalase                 | SC-50508   | Santa Cruz        |
| $\beta$ -actin           | SC-1616    | Santa Cruz        |
| SIRT3                    | #5490      | CST               |
| Acetylated-Lysine        | #9681      | CST               |
| Tom20                    | #42406     | CST               |
| MFN                      | 17090-1-AP | Proteintech Group |
| MID49                    | 16413-1-AP | Proteintech Group |
| Tom40                    | 18409-1-AP | Proteintech Group |
| Sam50                    | 20824-1-AP | Proteintech Group |
| Donkey anti-goat IgG HRP | SC-2020    | CST               |
| anti-rabbit IgG HRP      | #7074      | CST               |
| anti-mouse IgG HRP       | #7076      | CST               |
